## **Title**

Delayed Stroke Treatment during COVID-19 Pandemic in China

## **Running Head**

COVID-19 Pandemic and Stroke

## **Authors and Affiliations**

Shiyuan Gu, MD<sup>1,2</sup>; Zhengze Dai, MD<sup>3</sup>; Huachao Shen, MD<sup>4</sup>; Yongjie Bai, MD<sup>5</sup>;

Xiaohao Zhang, MD<sup>6</sup>; Xinfeng Liu, MD<sup>1,6</sup>; Gelin Xu, MD, PhD<sup>1,6</sup>

<sup>1</sup> Department of Neurology, Jinling Clinical College of Nanjing Medical University, Nanjing 210002, China

<sup>2</sup> Department of Neurology, The Affiliated Yixing Hospital of Jiangsu University, Yixing, 214200, China

<sup>3</sup> Department of Neurology, The Fourth Affiliated Hospital of Nanjing Medical University, Nanjing Pukou Hospital, Nanjing 210031, China

<sup>4</sup> Department of Neurology, BenQ Medical Center, Affiliated BenQ Hospital of Nanjing Medical University, Nanjing, 210031, China

<sup>5</sup> Department of Neurology, First Affiliated Hospital and College of Clinical Medicine of Henan University of Science and Technology, Luoyang, 471003, China

<sup>6</sup> Department of Neurology, Jinling Hospital, Medical School of Nanjing University, Nanjing 210002, China

## **Address for Correspondence and Reprints**

Professor Gelin Xu, Department of Neurology, Jinling Clinical College of Nanjing Medical University, Nanjing 210002, China. Tel: +86-25-84801861; Fax:

+86-25-84805169. Email: [gelinxu@nju.edu.cn](mailto:gelinxu@nju.edu.cn).

Xinfeng Liu, Department of Neurology, Jinling Clinical College of Nanjing Medical

University, No.305 East Zhongshan Road, Nanjing, 210002, Jiangsu Province, China.

Telephone number: +86-25-84801861

Fax number: +86-25-84805169

E-Mail address: xfliu2@vip.163.com

**Tables:** 3

**Word Count:** 3271

**Number of references:** 18

1 **ABSTRACT**

2 **Background:** Social distance, quarantine, pathogen testing and other preventive  
3 strategies implemented during COVID-19 pandemic may negatively influence the  
4 management of acute stroke. **Objective:** The current study aimed to evaluate the  
5 impacts of COVID-19 pandemic on treatment delay of acute stroke in China.

6 **Methods:** This study included patients with acute stroke admitted in two hospitals in  
7 Jiangsu, China. Patients admitted before and after the COVID-19 epidemic outbreak  
8 (January 31, 2020, as officially announced by Chinese government) were compared  
9 for pre- (measured as onset-to-door time) and post-hospital delay (measured as  
10 door-to-needle time). The influence factors for delayed treatment (indicated as  
11 onset-to-needle time >4.5 hours) were analyzed with multivariate logistic regression  
12 analysis.

13 **Results:** Onset-to-door time increased from 202 min (IQR 65-492) before to 317 min  
14 (IQR 75-790) after the COVID-19 pandemic ( $P=0.001$ ). Door-to-needle time  
15 increased from 50min (IQR 40-75) before to 65 min (IQR 48-84) after the COVID-19  
16 pandemic ( $P=0.048$ ). The proportion of patients with intravenous thrombolysis in  
17 those with acute ischemic stroke was decreased significantly after the pandemic (15.4%  
18 vs 20.1%;  $P=0.030$ ). Multivariate logistic regression analysis indicated that patients  
19 after COVID-19 pandemic, lower educational level, rural residency, mild symptoms  
20 and transported by other means than ambulance were associated with delayed  
21 treatment.

22 **Conclusions:** COVID-19 pandemic has remarkable impacts on the management of  
23 acute ischemic stroke. Both pre- and post-hospital delays were prolonged significantly,  
24 and proportion of patient arrived within the 4.5-hour time window for intravenous  
25 thrombolysis treatment was decreased. Given that anti-COVID-19 measures are

26 becoming medical routines, efforts are warranted to shorten the delay so that the  
27 outcomes of stroke could be improved.

28

29 **Key words:** acute stroke; COVID-19; intravenous thrombolysis; treatment delay

30

31

32 **Introduction**

33 Recently developed treatments, such as intravenous thrombolysis and mechanical  
34 thrombectomy, can significantly improve the outcomes of acute ischemic stroke. But  
35 the effects of these treatments were highly time-dependent, which emphasize the  
36 importance of rapid pre- and post-hospital managements. For selected patients with  
37 onset-to-needle time (ONT) shorter than 4.5 hours, intravenous thrombolysis could be  
38 applied. But those with ONT shorter than 3 hours had a higher likelihood of 90-day  
39 favorable outcome [1]. For selected patients with onset-to-puncture time (OPT)  
40 shorter than 6 hours, mechanical thrombectomy could be applied. Although patients  
41 with OPT between 6 and 24 hours still could be screened for mechanical  
42 thrombectomy, the effects attenuate rapidly with time delay. Current guidelines  
43 recommended that extra imaging examinations should be performed for selecting  
44 patients with OPT between 6 and 24 hours for mechanical thrombectomy [2,3].  
45 Therefore, when applying intravenous thrombolysis and mechanical thrombectomy in  
46 acute ischemic stroke patients, the shorter the treatment delays, the better the  
47 functional outcomes.

48 Since the outbreak of COVID-19 pandemic, China has implemented several  
49 nation-wide strategies for preventing and containing the spread of the disease [4].  
50 Social distance, quarantine, pathogen testing and other strategies were taken from  
51 January 31, 2020, as officially announced by Chinese government. These measures  
52 influenced not only the regular medical procedures, but also the health-seeking  
53 behaviors. All these changes may have influenced the management of stroke, but the  
54 impacts are largely undetermined [5]. This study aimed to explore the impact and  
55 extent of COVID-19 pandemic on treatment delay of acute stroke in China.  
56 Additionally, we probed potential factors responsible for the treatment delay.

57 **Methods**

58 *Study design and patient population*

59 This study is a part of an on-going program for analyzing pre- and post-hospital delay  
60 in managing stroke patients. Patients with acute stroke were enrolled in 2 tertiary  
61 hospitals in Jiangsu Province. On January 31, 2020, Chinese government announced  
62 several nation-wide strategies for preventing the COVID-19 pandemic. To evaluate  
63 the impacts of the pandemic on stroke management, patients with acute stroke within  
64 2 months before and after this time point were analyzed in this study. Acute stroke  
65 was diagnosed based on clinical symptoms and CT or MRI scans. Patients who  
66 reached the hospitals within 7 days after stroke onset were included. All participants  
67 and their relatives provided written informed consent, and the study was approved by  
68 the ethics committees of the participated hospital.

69 *Treatment Delay Assessment*

70 Demographic and clinical data were collected after hospitalization. Onset-to-door  
71 time (ODT) was defined as the duration from stroke symptom onset or time last  
72 known well to hospital arrival, which included awareness time, decision time and  
73 transporting time. Decision time is defined as the duration from symptom onset to the  
74 decision being made to go to hospital. Door-to-needle time (DNT) was defined as the  
75 time from hospital arrival to the start of intravenous thrombolysis. For those who did  
76 not meet the criteria of intravenous thrombolysis, DNT was based on a presumed  
77 thrombolytic therapy of earliest possibility. Door-to-puncture (DPT) time was defined  
78 as the duration from hospital arrival to groin puncture for mechanical thrombectomy.  
79 For those who did not meet the criteria of mechanical thrombectomy, DPT was based  
80 on a presumed mechanical thrombectomy of earliest possibility. Potential influencing

81 factors for treatment delay, such as residency, means of transportation and level of the  
82 first visited hospital, were retrieved and analyzed. The severity of stroke was  
83 measured with National Institutes of Health Stroke Scale (NIHSS). In this study, we  
84 choose a 4.5 hours as the cut point for defining delayed treatment because that 4.5  
85 hours is the accepted deadline for rt-PA intravenous thrombolysis at present [1].

### 86 *Statistical Analysis*

87 Continuous variables were expressed as mean± standard deviation (SD) or median  
88 and interquartile range (IQR) as appropriate. Categorical variables were presented as  
89 frequency and percentage. Continuous variables with normal distribution were  
90 compared using the Student's t-test. The Chi-square and Fisher's exact tests were used  
91 for comparing categorical values. Multiple-variable stepwise logistic regression was  
92 used to determine the main influencing factors of treatment delay. A two sided *P*  
93 value of <0.05 was deemed as statistical significance. All statistical analyses were  
94 performed using SPSS 25.

95 **Results**

96 A total of 267 patients were included during the described time frames, of which 161  
97 (60.3%) were arrived before and 106 (39.7%) after the COVID-19 pandemic. The  
98 mean age of the included patients was  $69.1 \pm 11.3$  years, and 167 (62.5%) of them  
99 were male. The median (IQR) NIHSS score at admission was 6 (3–13) in the  
100 Pre-COVID-19 group and 8 (5–16) in the Post-COVID-19 group ( $P=0.040$ ). However,  
101 no significant differences concerning age, sex, residence, education level, stroke  
102 subtypes and comorbidities were detected between patients arrived before and after  
103 the COVID-19 pandemic (**Table 1**).

104 The ODT, a proxy of pre-hospital delay, was significantly longer in post- than  
105 pre-COVID-19 pandemic patients (317 [IQR 65-790] vs 202 [IQR 25-492] min;  
106  $P=0.010$ ). The decision time for patients after the COVID-19 pandemic was  
107 significantly longer than that of those before COVID-19 pandemic (129 [IQR 55-430]  
108 vs 244 [IQR 80-710] min,  $P<0.001$ ). Time used for transportation was similar  
109 between patients before and after the COVID-19 pandemic (67 [IQR 33-88] vs 73  
110 [IQR 31-93] min;  $P=0.316$ ). DNT was prolonged significantly after the  
111 implementation of anti-pandemic strategies (65 [IQR 48-84] vs 50 [IQR 40-75] min,  
112  $P=0.048$ ). The proportion of patients from onset to treatment within 4.5 hours was  
113 significantly decreased after the COVID-19 pandemic (29.0% vs 34.8%,  $P=0.032$ ).  
114 The proportion of patients with intravenous thrombolysis in those with acute ischemic  
115 stroke was decreased significantly after the pandemic (15.4% vs 20.1%;  $P=0.030$ ).  
116 While the proportion of patients with mechanical thrombectomy in those with acute  
117 ischemic stroke remained unchanged (12.1% vs 15.7%,  $P=0.115$ , **Table 1**).

118 When compared with patients who arrived hospital within 4.5 hours ( $ONT \leq$   
119 4.5 hours), those who arrived hospital latter ( $ONT >4.5h$ ) had lower education level



120 (elementary education: 18.4% vs 37.2%,  $P=0.018$ ), more likely lived in rural areas  
121 (26.4% vs 33.9%,  $P=0.044$ ), less likely had hemorrhagic stroke (18.4% vs 14.4%,  
122  $P=0.041$ ), had lower NIHSS scores (8 vs 3,  $P=0.031$ ), less likely transferred by EMS  
123 (43.7% vs 16.1%,  $P<0.001$ ), more likely had self-management after stroke onset (9.2%  
124 vs 87.8%,  $P<0.001$ ), and more likely had stroke after the COVID-19 pandemic (27.6%  
125 vs 45.6%,  $P=0.031$ , **Table 2**).

126 **Table 3** presents the potential influencing factors for delayed treatment  
127 (ONT>4.5h) by multivariate logistic regression analysis. Compared with patients  
128 before COVID-19 pandemic, patients after COVID-19 pandemic had an OR of 1.52  
129 (95% CI, 1.02–2.94) for treatment delay. Compared with patients with advanced  
130 education, those with elementary education had an odds of 1.41 (95% CI, 1.08–2.31)  
131 for treatment delay. Compared with patients living in urban, those living in rural area  
132 had an odds of 1.20 (95% CI, 1.01–1.42) for treatment delay. Patients who firstly  
133 chose to self-manage stroke after onset had an OR of 2.03 (95% CI, 1.40–3.76) for  
134 treatment delay. Patients transported by EMS had an OR of 0.76 (95% CI, 0.68–0.86)  
135 for treatment delay. Patients with baseline NIHSS >10 had an OR of 0.64 (95% CI,  
136 0.45–0.89) for treatment delay.

137 **Discussion**

138 The current study highlights the impact of COVID-19 pandemic on treatment delay in  
139 patients with acute stroke. ODT and DTN were significantly prolonged, and  
140 proportion of patients arrived within the time window for intravenous thrombolysis  
141 was significantly decreased after COVID pandemic.

142 During COVID-19, patients may be reluctant to seek medical help for fear of  
143 being infected. Patients with mild symptoms may stay at home and managing stroke  
144 be themselves or their relatives. This speculation was partly confirmed by the higher  
145 NIHSS score in post-COVID-19. A similar pattern of delay in seeking medical care  
146 due to fear of being infected within the hospitals was observed in the Ebola epidemic  
147 in West Africa [6].

148 During the COVID-19 pandemic, the onset to needle time was significantly  
149 prolonged than before. Traffic control during the pandemic may delay the patient  
150 transportation. Social distance may influence the management of stroke patients.  
151 Procedures for COVID-19 prevention, such as information inquiring concerning  
152 travel and contact history, temperature measuring, chest X-ray or CT scanning,  
153 coronavirus nucleic acid or antibody testing, blood cell counting, and  
154 multidisciplinary consultation may all delay the management of stroke. On the other  
155 hand, medical staff may need more time to wear protective devices before they could  
156 manage stroke patients during the COVID-19 pandemic.

157 This study associated higher NIHSS score with shorter pre-hospital delay. This  
158 is consistent with some previous studies [7, 8], but not with others [9]. Patients with  
159 severe symptoms may be more obvious to be identified, but severe symptoms may  
160 render patients from seeking for help when alone. Transferred with ambulance was  
161 associated with shorter pre-hospital delay [10-13]. Early awareness of stroke onset

162 and rapid response are crucial to shorten the treatment delay [14, 15]. Previous studies  
163 [16] indicated that major factors for pre-hospital delay included unawareness of stroke  
164 symptoms, lack of understanding on importance of early response, and lack of  
165 knowledge on early management. Previous studies demonstrated that only 15.6% of  
166 respondents knew stroke warning signs [17]. A large proportion of respondents think  
167 that stroke symptoms may not warrant emergent management [18].

168 Several limitations should be addressed when interpreting the results of current  
169 study. Firstly, patients were enrolled outside the epicenter of COVID-19 pandemic in  
170 China, which may have under-estimated the impacts of the pandemic on stroke  
171 management. Secondly, with the accumulation of coping experiences, the impacts of  
172 COVID-19 pandemic on stroke management may be relieved. Finally, although the  
173 impacts of COVID-19 on intravenous thrombolysis and mechanical thrombectomy  
174 were analyzed, the impacts on stroke outcomes (e.g. 90-day modified Rankin Scale)  
175 were not analyzed.

176 In conclusion, COVID-19 pandemic has a remarkable influence on the  
177 management of acute ischemic stroke. Both pre- and post-hospital delays were  
178 prolonged significantly, and proportion of patient arrived within the 4.5-hour time  
179 window for intravenous thrombolysis treatment was decreased. Given that  
180 anti-COVID-19 measures are becoming medical routines, efforts are warranted to  
181 shorten the delay so that stroke outcome could be improved in this complex time.

182  
183  
184

185

186 **Statement of Ethics**

187 Subjects (or their parents or guardians) have given their written informed consent for  
188 being treated for IV tPA. The article is exempt from ethical committee approval since  
189 IV tPA is considered the standard of care for treating AIS and there has been no  
190 disclosure of the patients' information in this article.

191 **Funding Statement**

192 The work was supported by [National Natural Science Foundation of China] grant  
193 numbers [81870947].

194 **Conflicts of Interest Statement**

195 None declared.

196 **Author Contributions**

197 SG and ZD: study design, interpretation of results and manuscript drafting. SG, YB  
198 and HS: study design and interpretation of results. SG, ZD, YB, HS and XZ: data  
199 collection. GX and SG: study design, statistical analysis and critical revision of  
200 manuscript. SG: interpretation of results and critical revision of manuscript. GX and  
201 XL have full access to all of the data in the study and take responsibility for the  
202 integrity of the data and the accuracy of the data analysis.

203

204 **References**

- 205 1. Hacke W KM, Bluhmki E, Brozman M, et al. Thrombolysis with alteplase 3 to 4.5 hours  
206 after acute ischemic stroke. *New England journal of medicine*. 2008;359(13):1317-29.
- 207 1. Hacke W KM, Bluhmki E, Brozman M, et al. Thrombolysis with alteplase 3 to 4.5 hours  
208 after acute ischemic stroke. *New England journal of medicine*. 2008;359(13):1317-29.
- 209 2. Nogueira RG, Jadhav AP, Haussen DC, Bonafe A, Budzik RF, Bhuva P, et al.  
210 Thrombectomy 6 to 24 Hours after Stroke with a Mismatch between Deficit and Infarct. *New*  
211 *England Journal of Medicine*. 2018;378(1):11-21.
- 212 3. William J, Alejandro A, Teri A, Opeolu M, Nicholas C, Kyra B. 2018 Guidelines for the  
213 Early Management of Patients with Acute Ischemic Stroke. *Stroke*. 2018;49:e6–e99.
- 214 4. Cucinotta D, Vanelli M. WHO Declares COVID-19 a Pandemic. *Acta bio-medica : Atenei*  
215 *Parmensis*. 2020;91(1):157-60.
- 216 5. Yang B, Wang T, Chen J, Chen Y, Wang Y, Gao P, et al. Impact of the COVID-19  
217 pandemic on the process and outcome of thrombectomy for acute ischemic stroke. *Journal of*  
218 *NeuroInterventional Surgery*. 2020:neurintsurg-2020-016177.
- 219 6. McQuilkin P, Udhayashankar K, Niescierenko M, Maranda L. Health-Care Access during  
220 the Ebola Virus Epidemic in Liberia. *The American journal of tropical medicine and hygiene*.  
221 2017;97(3):931-6.
- 222 7. Jin H, Zhu S, Wei JW, Wang J, Liu M, Wu Y, et al. Factors associated with prehospital  
223 delays in the presentation of acute stroke in urban China. *Stroke*. 2012;43(2):362-70.
- 224 8. Fang J, Yan W, Jiang GX, Li W, Cheng Q. Time interval between stroke onset and  
225 hospital arrival in acute ischemic stroke patients in Shanghai, China. *Clinical neurology and*

- 226 neurosurgery. 2011;113(2):85-8.
- 227 9. Huang Q, Ma QF, Jia JP, Feng J, Cheng WY, Chang H, et al. Referral leads to  
228 prehospital delay of intravenous thrombolysis for acute ischemic stroke in Beijing.  
229 International journal of stroke : official journal of the International Stroke Society.  
230 2015;10(7):E80-1.
- 231 10. Minnerup J, Wersching H, Unrath M, Berger K. Effects of emergency medical service  
232 transport on acute stroke care. European journal of neurology. 2014;21(10):1344-7.
- 233 11. Jiang B, Ru X, Sun H, Liu H, Sun D, Liu Y, et al. Pre-hospital delay and its associated  
234 factors in first-ever stroke registered in communities from three cities in China. Scientific  
235 reports. 2016;6(1).
- 236 12. Yang H, Zhang J, Xie J, Yang C, Dong X, Gong Y, et al. Factors influencing pre-hospital  
237 delay among acute ischemic stroke patients in the midlands of China. International journal of  
238 cardiology. 2014;172(2):533-4.
- 239 13. Price C, Rae V, Duckett J, Wood R, Gray J, McMeekin P, et al. An observational study of  
240 patient characteristics associated with the mode of admission to acute stroke services in  
241 North East, England. PloS one. 2013;8(10):e76997.
- 242 14. Bouckaert M, Lemmens R, Thijs V. Reducing prehospital delay in acute stroke. Nature  
243 reviews Neurology. 2009;5(9):477-83.
- 244 15. Mattew J. Reducing the Delay Between Stroke Onset and Hospital Arrival: Is It an  
245 Achievable Goal? Journal of the American Heart Association. 2012;1:e002477
- 246 16. Sun H, Chen S, Jiang B, Zhao X, Wu S, Liu Y, et al. Public knowledge of stroke in  
247 Chinese urban residents: a community questionnaire study. Neurological research.

248 2011;33(5):536-40.

249 17. Yang J, Zheng M, Cheng S, Ou S, Zhang J, Wang N, et al. Knowledge of stroke

250 symptoms and treatment among community residents in Western Urban China. Journal of

251 stroke and cerebrovascular diseases : the official journal of National Stroke Association.

252 2014;23(5):1216-24.

253 18. Le Bonniec A, Haesebaert J, Derex L, Porthault S, Preau M, Schott AM. Why Patients

254 Delay Their First Contact with Health Services After Stroke? A Qualitative Focus

255 Group-Based Study. PloS one. 2016;11(6):e0156933.

256

257

**Table 1.** Characteristics and treatment delay of stroke patients before and after COVID-19 pandemic

| Characteristics                   | Pre-COVID-19<br>(n=161) | Post-COVID-19<br>(n=106) | <i>P</i> Value |
|-----------------------------------|-------------------------|--------------------------|----------------|
| Age, year, mean                   | 69.5±11.1               | 70.1±12.2                | 0.334          |
| Male gender, n (%)                | 97 (60.2)               | 70(66.0)                 | 0.133          |
| Education, n (%)                  |                         |                          | 0.242          |
| Elementary education              | 48 (29.8)               | 35 (33.0)                |                |
| Secondary education               | 90 (55.9)               | 59 (55.6)                |                |
| Higher education                  | 23 (14.3)               | 12 (11.4)                |                |
| Residence, n (%)                  |                         |                          | 0.411          |
| Urban                             | 108 (67.1)              | 75 (70.8)                |                |
| Rural                             | 53 (32.9)               | 31 (29.2)                |                |
| Stroke subtype, n (%)             |                         |                          | 0.532          |
| Ischemic stroke                   | 134 (83.2)              | 91 (85.8)                |                |
| Hemorrhagic stroke                | 27 (16.8)               | 15 (14.2)                |                |
| NIHSS, median (IQR)               | 6 (3-13)                | 8 (5-16)                 | 0.040          |
| Stroke history, n (%)             | 35 (21.7)               | 24 (22.6)                | 0.871          |
| Hypertension, n (%)               | 103 (67.0)              | 67 (63.2)                | 0.642          |
| Diabetes, n (%)                   | 72 (44.7)               | 50 (47.2)                | 0.556          |
| Hyperlipidemia, n (%)             | 53 (32.9)               | 33 (31.1)                | 0.734          |
| Atrial fibrillation, n (%)        | 18 (11.1)               | 14 (13.2)                | 0.799          |
| Coronary heart disease, n (%)     | 22 (13.6)               | 18 (17.0)                | 0.677          |
| Smoking, n (%)                    | 75 (46.6)               | 43 (40.5)                | 0.143          |
| Alcohol drinking, n (%)           | 55 (34.1)               | 40 (37.7)                | 0.400          |
| ODT, median (IQR) min             | 202 (25-492)            | 317 (65-790)             | 0.010          |
| Decision time                     | 129 (55-430)            | 244 (80-710)             | <0.001         |
| Transportation                    | 73 (31-93)              | 67 (33-88)               | 0.316          |
| DTN, median (IQR) min             | 50 (40-75)              | 65 (48-84)               | 0.048          |
| Onset to treatment within 4.5h, % | 56 (34.8)               | 31 (29.0)                | 0.032          |
| Intravenous thrombolysis, %*      | 27 (20.1)               | 14 (15.4)                | 0.030          |
| Mechanical thrombectomy, %*       | 21 (15.7)               | 11 (12.1)                | 0.115          |

IQR indicates interquartile range; NIHSS, National Institutes of Health Stroke Scale;

ODT, onset-to door time; DTN, door-to-needle time.

\*Patients with ischemic stroke.



**Table 2.** Influencing factors for delayed treatment

| Characteristics                    | Onset-to-needle time |                      | P Value |
|------------------------------------|----------------------|----------------------|---------|
|                                    | ≤4.5 hour<br>(n=87)  | >4.5 hour<br>(n=180) |         |
| Age, y, mean                       | 67.5±12.2            | 70.1±11.8            | 0.134   |
| Male gender, n (%)                 | 56 (64.4)            | 111 (61.6)           | 0.736   |
| Education, n (%)                   |                      |                      | 0.018   |
| Elementary education               | 16 (18.4)            | 67 (37.2)            |         |
| Secondary education                | 50 (57.5)            | 99 (55.0)            |         |
| Higher education                   | 21 (24.1)            | 14 (7.8)             |         |
| Residence, n (%)                   |                      |                      | 0.044   |
| Urban                              | 64 (73.6)            | 119 (66.1)           |         |
| Rural                              | 23 (26.4)            | 61 (33.9)            |         |
| Stroke subtype, n (%)              |                      |                      | 0.041   |
| Ischemic stroke                    | 71 (81.6)            | 154 (85.6)           |         |
| Hemorrhagic stroke                 | 16 (18.4)            | 26 (14.4)            |         |
| NIHSS at admission, median (IQR)   | 8 (3-14)             | 3 (2-7)              | 0.031   |
| Stroke history, n (%)              | 21 (24.1)            | 38 (21.1)            | 0.523   |
| Hypertension, n (%)                | 58 (66.6)            | 112 (62.2)           | 0.278   |
| Diabetes, n (%)                    | 39 (44.8)            | 73 (40.6)            | 0.298   |
| Hyperlipidemia, n (%)              | 27 (31.0)            | 59 (32.7)            | 0.776   |
| Atrial fibrillation, n (%)         | 13 (14.9)            | 19 (10.6)            | 0.165   |
| Coronary heart disease, n (%)      | 14 (14.9)            | 28 (15.6)            | 0.679   |
| Current smoker, n (%)              | 42 (48.3)            | 76 (42.2)            | 0.108   |
| Regular drinker, n (%)             | 34 (39.1)            | 61 (33.9)            | 0.182   |
| Self-management after onset, n (%) | 8 (9.2)              | 158 (87.8)           | <0.001  |
| Transporting by EMS, n (%)         | 38 (43.7)            | 29 (16.1)            | <0.001  |
| Post-COVID-19 period, n (%)        | 24 (27.6)            | 82 (45.6)            | 0.035   |

IQR, interquartile range; NIHSS, National Institutes of Health Stroke Scale; EMS,

emergency medical services.

**Table 3.** Multivariate logistic regression analysis of influencing factors for delayed treatment (ONT>4.5h)

| Variables                                | OR   | 95% CI    | <i>P</i> |
|------------------------------------------|------|-----------|----------|
| Elementary vs higher education           | 1.41 | 1.08-2.31 | 0.045    |
| Rural vs urban residency                 | 1.20 | 1.01-1.42 | 0.030    |
| NIHSS > 10 vs ≤10                        | 0.64 | 0.45-0.89 | <0.001   |
| Self-management after onset              | 2.03 | 1.40-3.76 | <0.001   |
| Transporting by ambulance vs other means | 0.76 | 0.68-0.86 | 0.038    |
| Onset after COVID-19 pandemic            | 1.52 | 1.02-2.94 | 0.010    |

ONT indicates onset-to-needle time; OR, odds ratio; CI, confidence interval; NIHSS, National Institutes of Health Stroke Scale.
